# Supplementary material for: De Novo Versus Recurrent HER2‐Positive Metastatic Breast Cancer: Patient Characteristics, Treatment, and Survival from the SystHERs Registry
Source: PubMed Central journal article supplement — Oncologist. 2019 Oct 14;25(2):e214–22. doi: 10.1634/theoncologist.2019-0446 (PMC7011632; doi:10.1634/theoncologist.2019-0446), 2019-10-14

Supplemental Figures for:

De Novo Versus Recurrent HER2-Positive Metastatic Breast Cancer: Patient Characteristics, Treatment, and Survival From the SystHERs Registry

Debu Tripathy et al.

**Figure S1. (A) Progression-free survival and (B) overall survival in patients with recurrent disease and EBC to MBC diagnosis durations of <24 vs ≥24 months**

CI, confidence interval; EBC, early breast cancer; MBC, metastatic breast cancer; NE, not evaluable; OS, overall survival; PFS, progression-free survival.

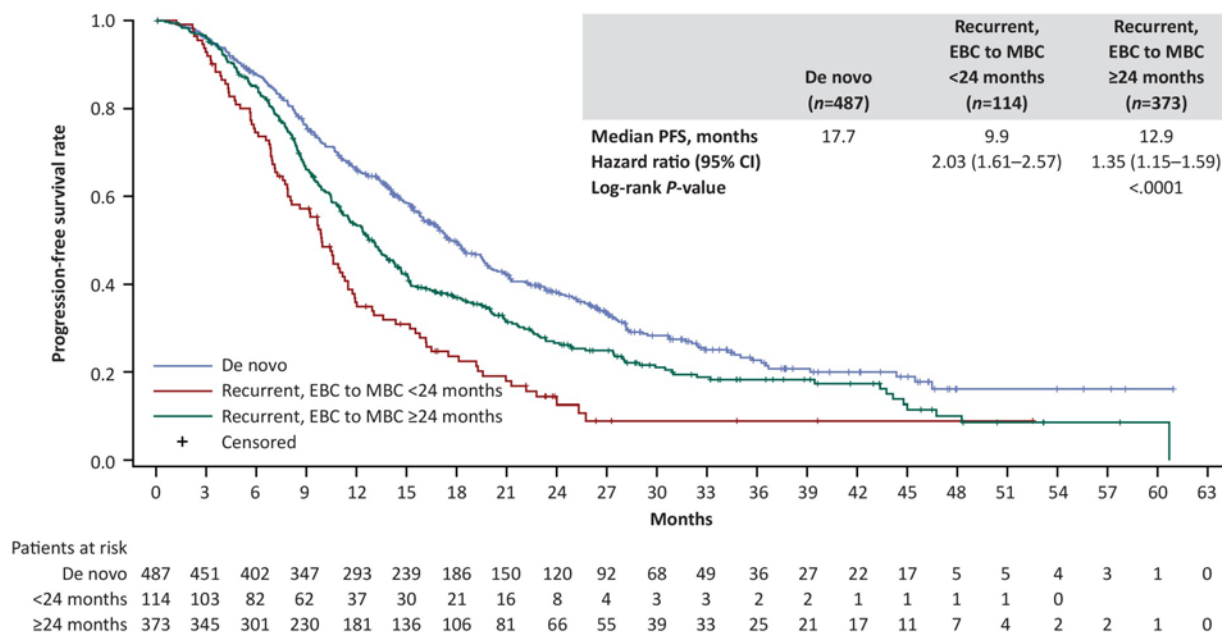

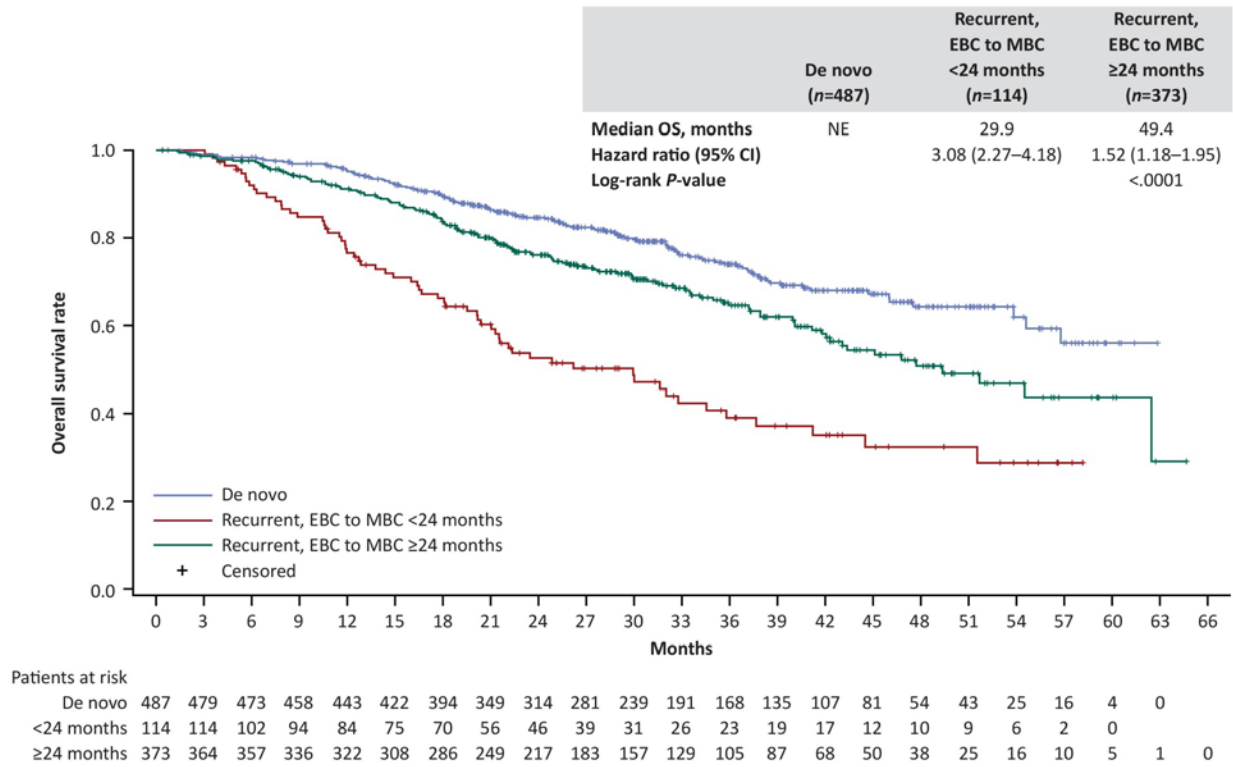

Supplement: ONCO-25-e214-s001.pdf [file ONCO-25-e214-s001.pdf]
