# Supplementary material for: De Novo Versus Recurrent HER2‐Positive Metastatic Breast Cancer: Patient Characteristics, Treatment, and Survival from the SystHERs Registry
Source: PubMed Central journal article supplement — Oncologist. 2019 Oct 14;25(2):e214–22. doi: 10.1634/theoncologist.2019-0446 (PMC7011632; doi:10.1634/theoncologist.2019-0446), 2019-10-14
Supplement: ONCO-25-e214-s002.pdf [file ONCO-25-e214-s002.pdf]

Supplemental Tables for:

De Novo Versus Recurrent HER2-Positive Metastatic Breast Cancer: Patient Characteristics, Treatment, and Survival From the SystHERs Registry

Debu Tripathy et al.

**Table S1. Baseline cardiovascular disease history and risk factors**

| Characteristic                                                 | All eligible<br>(n=977) | De novo<br>(n=487) | Recurrent<br>(n=490) |
|----------------------------------------------------------------|-------------------------|--------------------|----------------------|
| History of cardiovascular disease, n (%)                       | 133 (13.6)              | 59 (12.1)          | 74 (15.1)            |
| Chronic atrial fibrillation                                    | 23 (2.4)                | 7 (1.4)            | 16 (3.3)             |
| Congestive heart failure                                       | 17 (1.7)                | 8 (1.6)            | 9 (1.8)              |
| Myocardial infarction                                          | 18 (1.8)                | 13 (2.7)           | 5 (1.0)              |
| Peripheral vascular disease                                    | 3 (0.3)                 | 1 (0.2)            | 2 (0.4)              |
| Stroke                                                         | 15 (1.5)                | 9 (1.8)            | 6 (1.2)              |
| Cardiovascular risk factors, n (%)                             | 515 (52.7)              | 250 (51.3)         | 265 (54.1)           |
| Diabetes mellitus                                              | 113 (11.6)              | 54 (11.1)          | 59 (12.0)            |
| First degree relative with early cardiac death (age <65 years) | 22 (2.3)                | 11 (2.3)           | 11 (2.2)             |
| Hypercholesterolemia                                           | 182 (18.6)              | 82 (16.8)          | 100 (20.4)           |
| Hypertension                                                   | 395 (40.4)              | 191 (39.2)         | 204 (41.6)           |
| Obesity                                                        | 166 (17.0)              | 84 (17.2)          | 82 (16.7)            |

Supplemental Tables for:

De Novo Versus Recurrent HER2-Positive Metastatic Breast Cancer: Patient Characteristics, Treatment, and Survival From the SystHERs Registry

Debu Tripathy et al.

**Table S2. Systemic treatments<sup>a</sup> for EBC in patients with recurrent MBC (n=430 patients with systemic treatment data for EBC)**

| Treatment                                               | Neoadjuvant or adjuvant | Neoadjuvant | Adjuvant   |
|---------------------------------------------------------|-------------------------|-------------|------------|
| Any systemic therapy, n (%)                             | 430 (100)               | 203 (47.2)  | 391 (90.9) |
| Any chemotherapy                                        | 390 (90.7)              | 193 (44.9)  | 229 (53.3) |
| Any taxane <sup>b</sup>                                 | 355 (82.6)              | 172 (40.0)  | 197 (45.8) |
| Any alkylating agent                                    | 229 (53.3)              | 92 (21.4)   | 140 (32.6) |
| Any anthracycline                                       | 205 (47.7)              | 81 (18.8)   | 125 (29.1) |
| Any platinum compound                                   | 145 (33.7)              | 83 (19.3)   | 65 (15.1)  |
| Any hormonal therapy                                    | 272 (63.3)              | 29 (6.7)    | 261 (60.7) |
| Any aromatase inhibitor                                 | 183 (42.6)              | 14 (3.3)    | 180 (41.9) |
| Any tamoxifen                                           | 153 (35.6)              | 15 (3.5)    | 143 (33.3) |
| Any HER2-targeted therapy                               | 283 (65.8)              | 147 (34.2)  | 237 (55.1) |
| Any trastuzumab                                         | 283 (65.8)              | 147 (34.2)  | 236 (54.9) |
| Any pertuzumab + trastuzumab                            | 27 (6.3)                | 22 (5.1)    | 8 (1.9)    |
| Any lapatinib                                           | 4 (0.9)                 | 2 (0.5)     | 2 (0.5)    |
| Trastuzumab + any chemotherapy                          | 278 (64.7)              | 145 (33.7)  | 141 (32.8) |
| Trastuzumab + any taxane <sup>b</sup>                   | 269 (62.6)              | 141 (32.8)  | 128 (29.8) |
| Trastuzumab + any alkylating agent                      | 131 (30.5)              | 54 (12.6)   | 67 (15.6)  |
| Trastuzumab + any platinum compound                     | 141 (32.8)              | 80 (18.6)   | 62 (14.4)  |
| Trastuzumab + any anthracycline                         | 116 (27.0)              | 51 (11.9)   | 58 (13.5)  |
| Trastuzumab + any hormonal therapy                      | 163 (37.9)              | 13 (3.0)    | 137 (31.9) |
| Trastuzumab + any aromatase inhibitor                   | 109 (25.3)              | 5 (1.2)     | 95 (22.1)  |
| Trastuzumab + any tamoxifen                             | 89 (20.7)               | 8 (1.9)     | 74 (17.2)  |
| HER2-targeted therapy + chemotherapy + hormonal therapy | 158 (36.7)              | 13 (3.0)    | 84 (19.5)  |

Abbreviations: EBC, early breast cancer; HER2, human epidermal growth factor receptor 2; MBC, metastatic breast cancer.

<sup>a</sup>Treatments are not mutually exclusive.

<sup>b</sup>“Any taxane” includes a small number of patients who received an epothilone.

Supplemental Tables for:

De Novo Versus Recurrent HER2-Positive Metastatic Breast Cancer: Patient Characteristics, Treatment, and Survival From the SystHERs Registry

Debu Tripathy et al.

**Table S3. Patient-reported outcomes in patients with de novo and recurrent HER2-positive MBC**

| Measure <sup>a</sup>                             | Overall completion rate | Median score at enrollment (IQR) |                            | Brief description                                                                                                                                                                                                                            |
|--------------------------------------------------|-------------------------|----------------------------------|----------------------------|----------------------------------------------------------------------------------------------------------------------------------------------------------------------------------------------------------------------------------------------|
|                                                  |                         | De novo                          | Recurrent                  |                                                                                                                                                                                                                                              |
| FACT-B <sup>1</sup>                              | 79.4%<br>(n=776)        | n=392<br>104.4<br>(87–118)       | n=384<br>100.4<br>(83–116) | <ul style="list-style-type: none"> <li>Quality of life assessment based on a sum of five subscales measuring physical, social, emotional, functional, and breast cancer–related well-being</li> <li>Maximum score 148<sup>b</sup></li> </ul> |
| FACT-B TOI <sup>1</sup>                          | 79.6%<br>(n=778)        | n=393<br>63.0<br>(50–74)         | n=385<br>60.0<br>(47–72)   | <ul style="list-style-type: none"> <li>Quality of life assessment based on a sum of the FACT-B physical, functional, and breast subscales</li> <li>Maximum score 96<sup>b</sup></li> </ul>                                                   |
| RSC-ALS <sup>2</sup>                             | 80.3%<br>(n=785)        | n=398<br>87.5<br>(67–100)        | n=387<br>85.7<br>(63–100)  | <ul style="list-style-type: none"> <li>Impairment of daily activities assessment measuring the impact of cancer on activities of daily living</li> <li>Maximum score 100<sup>b</sup></li> </ul>                                              |
| MDASI-BT cognitive symptoms <sup>3</sup>         | 77.3%<br>(n=755)        | n=384<br>0.8<br>(0–3)            | n=371<br>1.0<br>(0–3)      | <ul style="list-style-type: none"> <li>Cognitive dysfunction assessment measuring brain tumor-related symptom severity</li> <li>Maximum score 10<sup>c</sup></li> </ul>                                                                      |
| MDASI-BT interference in daily life <sup>3</sup> | 77.1%<br>(n=753)        | n=381<br>2.0<br>(1–5)            | n=372<br>2.3<br>(1–5)      | <ul style="list-style-type: none"> <li>Cognitive dysfunction assessment measuring brain tumor-related interference in daily life</li> <li>Maximum score 10<sup>c</sup></li> </ul>                                                            |

<sup>a</sup>Questionnaires for FACT-B and RSC-ALS are available as supplemental files; questionnaires for MDASI-BT are available online<sup>4</sup>.

<sup>b</sup>Higher scores indicate better function.

<sup>c</sup>Higher scores indicate greater impairment.

Abbreviations: FACT-B, Functional Assessment of Cancer Therapy-Breast; FACT-B TOI, FACT-B Trial Outcome Index; HER2, human epidermal growth factor receptor 2; IQR, interquartile range; MBC, metastatic breast cancer; MDASI-BT, MD Anderson Symptom Inventory–Brain Tumor Module; RSC-ALS, Rotterdam Symptom Checklist–Activity Level Scale.

## References

1. Brady MJ, Cella DF, Mo F et al. Reliability and validity of the Functional Assessment of Cancer Therapy-Breast quality-of-life instrument. *J Clin Oncol* 1997;15:974–986.
2. de Haes JC, van Knippenberg FC, Neijt JP. Measuring psychological and physical distress in cancer patients: structure and application of the Rotterdam Symptom Checklist. *Br J Cancer* 1990;62:1034–1038.

Supplemental Tables for:

De Novo Versus Recurrent HER2-Positive Metastatic Breast Cancer: Patient Characteristics, Treatment, and Survival From the SystHERs Registry

Debu Tripathy et al.

3. Armstrong TS, Mendoza T, Gning I et al. Validation of the M.D. Anderson Symptom Inventory Brain Tumor Module (MDASI-BT). *J Neurooncol* 2006;80:27–35.

4. M.D. Anderson Symptom Inventory–Brain Tumor Module (MDASI-BT).

<http://www3.mdanderson.org/depts/symptomresearch/pdf/MDASI-BrainTumor%20-%20SAMPLE.pdf>. Last accessed September 11, 2019.

Supplemental Tables for:

De Novo Versus Recurrent HER2-Positive Metastatic Breast Cancer: Patient Characteristics, Treatment, and Survival From the SystHERs Registry

Debu Tripathy et al.

**Table S4. Progression-free and overall survival in patient subgroups based on (A) hormone receptor status, (B) receipt of first-line HER2-targeted therapy, and (C) receipt of first-line chemotherapy**

**(A)**

|                    | <b>De novo</b>                             |                                            | <b>Recurrent</b>                           |                                            |
|--------------------|--------------------------------------------|--------------------------------------------|--------------------------------------------|--------------------------------------------|
|                    | Hormone receptor–positive<br><i>n</i> =317 | Hormone receptor–negative<br><i>n</i> =170 | Hormone receptor–positive<br><i>n</i> =368 | Hormone receptor–negative<br><i>n</i> =122 |
| Median PFS, months | 19.1                                       | 16.1                                       | 13.1                                       | 9.9                                        |
| Median OS, months  | NE                                         | NE                                         | 47.7                                       | 31.6                                       |

**(B)**

|                    | <b>De novo</b>                         |                                          | <b>Recurrent</b>                       |                                          |
|--------------------|----------------------------------------|------------------------------------------|----------------------------------------|------------------------------------------|
|                    | HER2-targeted therapy<br><i>n</i> =471 | No HER2-targeted therapy<br><i>n</i> =16 | HER2-targeted therapy<br><i>n</i> =452 | No HER2-targeted therapy<br><i>n</i> =38 |
| Median PFS, months | 18.3                                   | 2.6                                      | 12.4                                   | 6.1                                      |
| Median OS, months  | NE                                     | 15.7                                     | 45.1                                   | 29.9                                     |

**(C)**

|                    | <b>De novo</b>                |                                 | <b>Recurrent</b>              |                                 |
|--------------------|-------------------------------|---------------------------------|-------------------------------|---------------------------------|
|                    | Chemotherapy<br><i>n</i> =437 | No chemotherapy<br><i>n</i> =50 | Chemotherapy<br><i>n</i> =392 | No chemotherapy<br><i>n</i> =98 |
| Median PFS, months | 18.3                          | 12.6                            | 12.4                          | 10.2                            |
| Median OS, months  | NE                            | NE                              | 44.5                          | 51.5                            |

Abbreviations: HER2, human epidermal growth factor receptor 2; NE, not estimable; OS, overall survival; PFS, progression-free survival.
